# Supplementary material for: Palladium catalyst imbedded in polymers of intrinsic microporosity for the Suzuki–Miyaura coupling reaction
Source: RSC Adv. 2018 Oct 16;8(61):35205–10. doi: 10.1039/c8ra06214e (PMC9087636; doi:10.1039/c8ra06214e)
Supplement: RA-008-C8RA06214E-s001 [file RA-008-C8RA06214E-s001.pdf]

Supporting Information:

**Palladium (Pd) catalyst imbedded in polymers of intrinsic  
microporosity for Suzuki-Miyaura coupling reaction**

Junwen Xu,<sup>†,‡</sup> Junjie Ou,<sup>\*,†</sup> Lianfang Chen,<sup>†,‡</sup> Haiyang Zhang,<sup>†</sup> Shujuan Ma,<sup>†</sup> Mingliang Ye<sup>\*,†</sup>

<sup>†</sup>Key Laboratory of Separation Science for Analytical Chemistry, Dalian Institute of Chemical Physics, Chinese Academy of Sciences, Dalian 116023, China

<sup>‡</sup>University of Chinese Academy of Sciences, Beijing 100049, China

**Corresponding Author**

\*E-mail: junjieou@dicp.ac.cn (J. Ou)

\*E-mail: mingliang@dicp.ac.cn (M. Ye)

## Table of Contents

### 1. Chemicals and Instruments

### 2. Supplementary Figures and Tables

Figure S1.  $^1\text{H}$  NMR spectra of monomer NBTfD.

Figure S2.  $^1\text{H}$  NMR spectra of monomer PBTfD.

Figure S3.  $^{13}\text{C}$  CP/MAS NMR spectra of PIM-N (c) and catalysts Pd/PIM-N (d).

Figure S4. SEM image of PIM-N.

Figure S5. SEM image of Pd/PIM-N.

Figure S6. SEM image of Pd/PIM-N after one cycle.

Figure S7. TEM image of PIM-N.

Figure S8. TEM image of Pd/PIM-N.

Figure S9. TEM image of Pd/PIM-N after one cycle.

Figure S10. Nitrogen adsorption isotherms PIM-N (circular) and Pd/PIM-N (rhombus).

Figure S11. The XPS image of Pd/PIM-P and Pd/PIM-N.

### 1. Chemicals and Instruments

p-Phenylenediamine, 1,5-naphthalenediamine, tetrafluorophthalic anhydride 5,5',6,6'-tetrahydroxy-3,3,3',3'-tetramethyl spirobisindane were purchased from TCI chemical (Shanghai, China). Palladium (II) acetate and anhydrous DMF was purchased from Sigma-Aldrich (St Louis, Mo, USA). Dichloromethane, glacial acetic acid, ethanol, acetonitrile and potassium carbonate anhydrous ( $K_2CO_3$ ) were obtained from Kemiou Chemical Regent Co., Ltd. (Tianjin, China). The water was doubly distilled and purified by Milli-Q system (Millipore Inc., Milford, MA, USA). The C18 AQ beads (5  $\mu$ m, 120 Å) were obtained from MichromBioResources (Auburn, CA).

FT-IR spectra were obtained on a spectrometer with KBr pellets containing polymer sample (Thermo Scientific, USA). Elemental analysis was carried out on EMIA-8100H and EMG-930 (HORIBA, Japan). Solid-state  $^{13}C$  cross-polarization magnetic angle spinning (CP-MAS) NMR spectra and  $^1H$  NMR spectra were recorded on a Bruker Advance III 500 NMR spectrometer (Germany). X-ray photoelectron spectroscopy (XPS) data were acquired using an ESCALAB 250Xi XPS spectrometer with an Al  $K\alpha$  X-ray source (Thermo Scientific, USA). The morphology study of porous organic polymer was carried out on a scanning electron microscopy (SEM, Gemini SEM 300, Zeiss, Germany). Transmission electron microscopy (TEM) was conducted on a JEOL 2000 EX electronic microscope (Japan) with an accelerating voltage of 120 keV. Nitrogen adsorption-desorption measurements were performed on a Micromeritics ASAP 2460 (USA) surface area analyzer and pore size analyzer. The samples were outgassed under vacuum for 7 h at 120 °C before measurements. The surface area was calculated via the Brunauer-Emmett-Teller (BET) method. Chromatography analysis was performed on UPLC (Water, USA).

## 2. Supplementary figures and tables

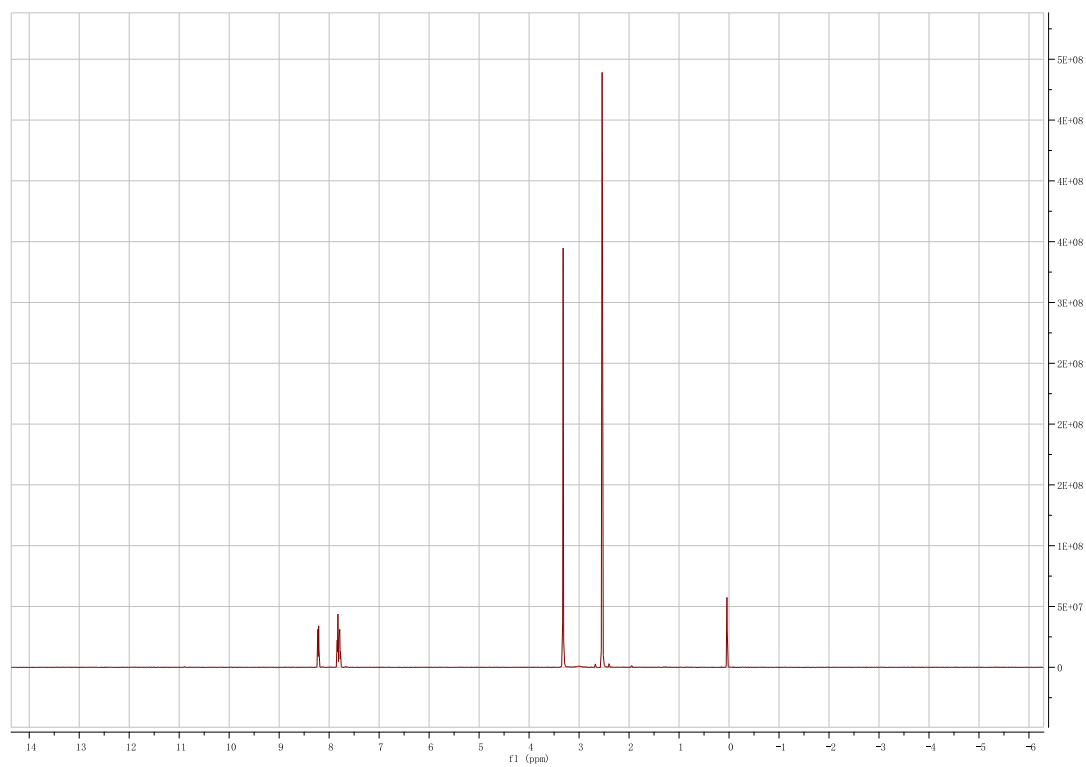

**Figure S1.**  $^1\text{H}$  NMR spectra of monomer NBTfD.

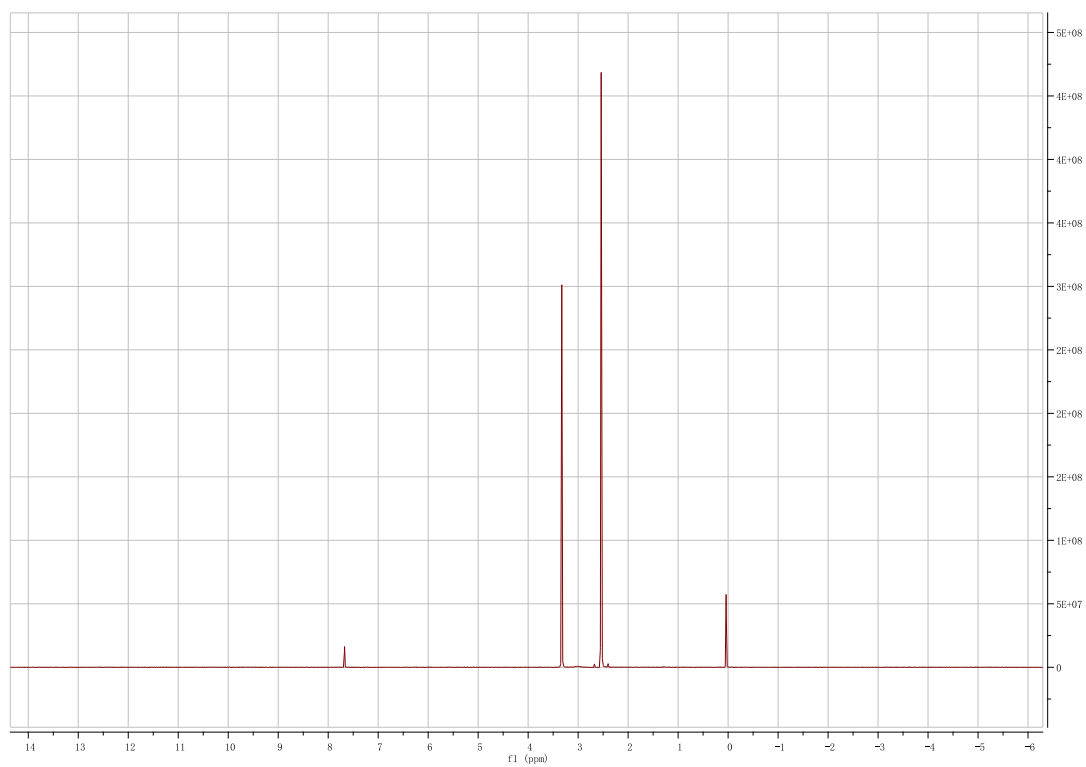

**Figure S2.**  $^1\text{H}$  NMR spectra of monomer PBTfD.

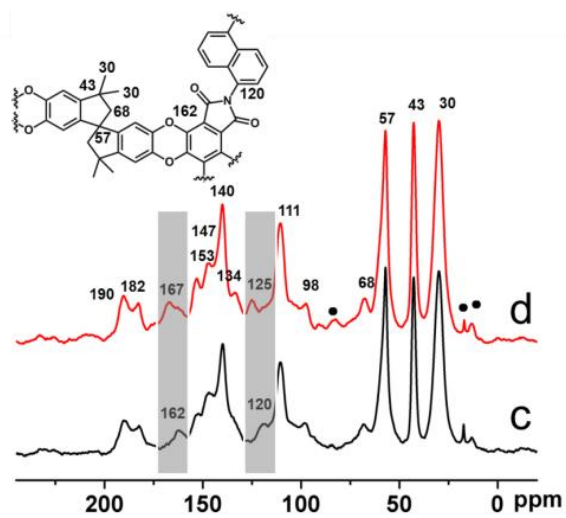

**Figure S3.**  $^{13}\text{C}$  CP/MAS NMR spectra of PIM-N (c) and catalysts Pd/PIM-N (d).

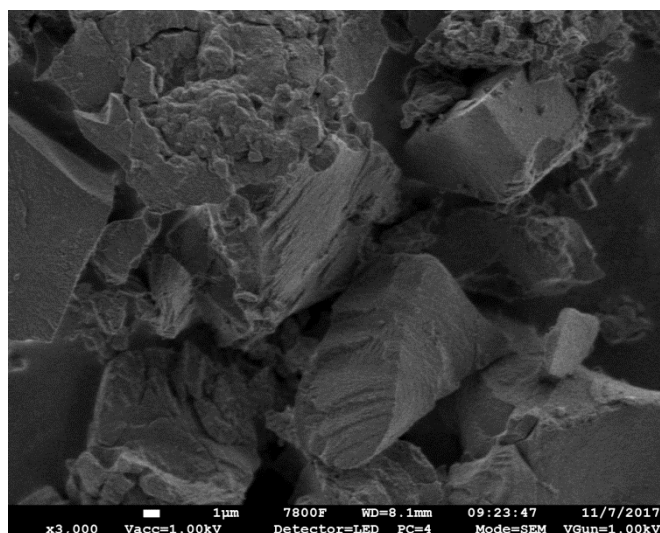

**Figure S4.** SEM image of PIM-N.

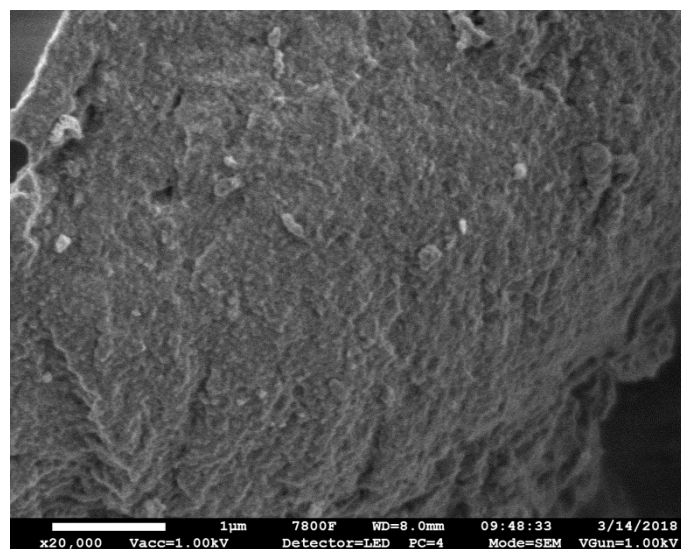

**Figure S5.** SEM image of Pd/PIM-N.

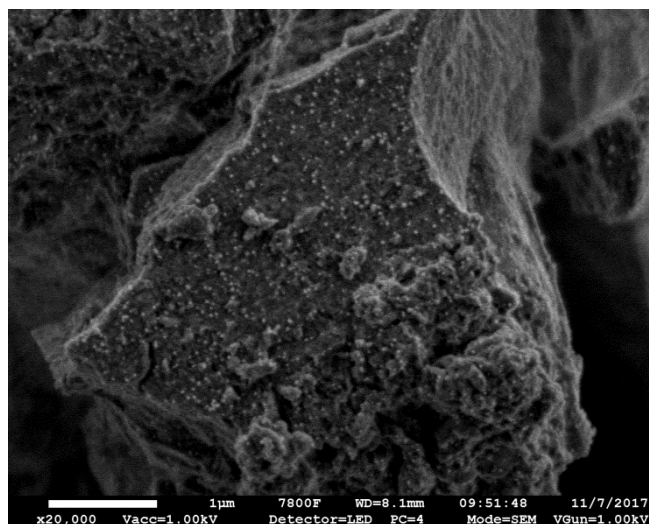

**Figure S6.** SEM image of Pd/PIM-N after one cycle.

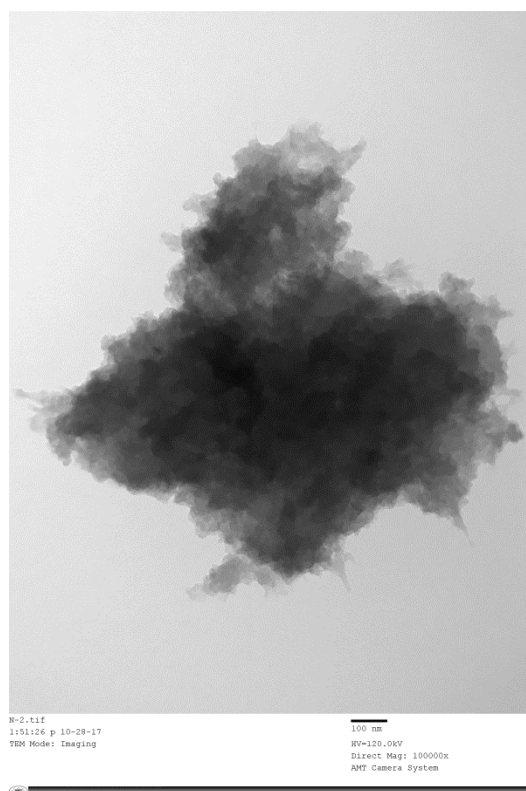

**Figure S7.** TEM image of PIM-N.

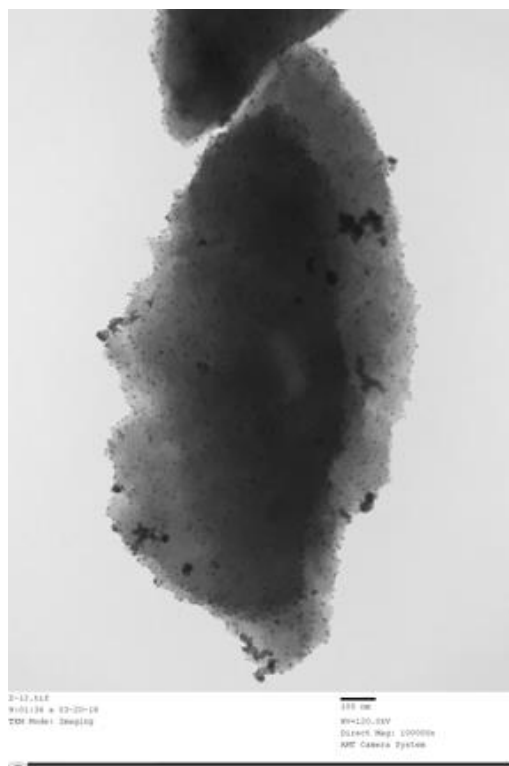

**Figure S8.** TEM image of Pd/PIM-N.

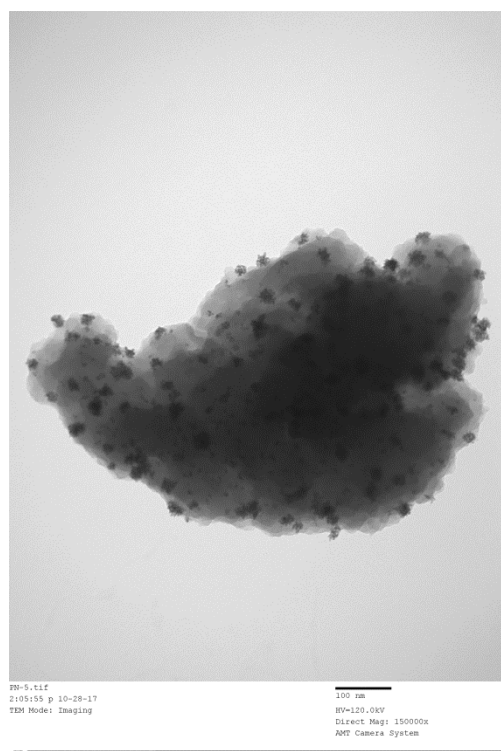

**Figure S9.** TEM image of Pd/PIM-N after one cycle.

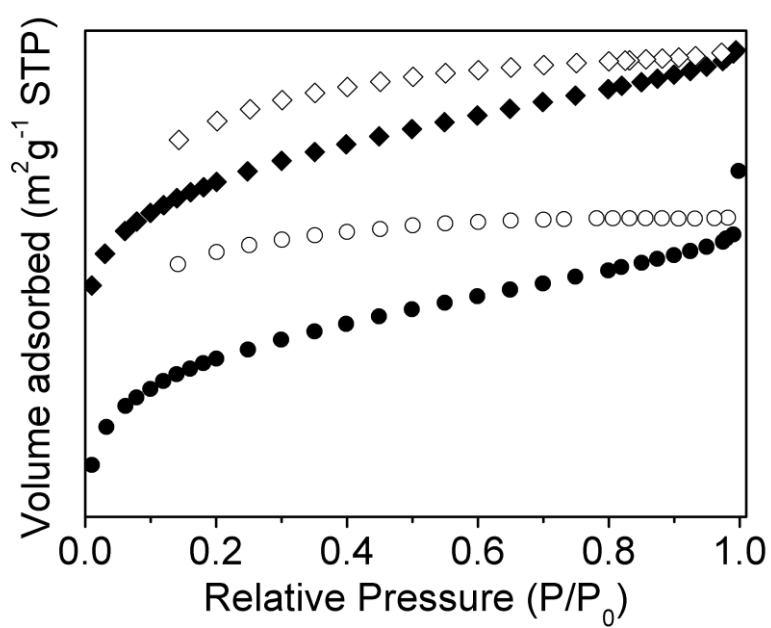

**Figure S10.** Nitrogen adsorption isotherms PIM-N (circular) and Pd/PIM-N (rhombus).

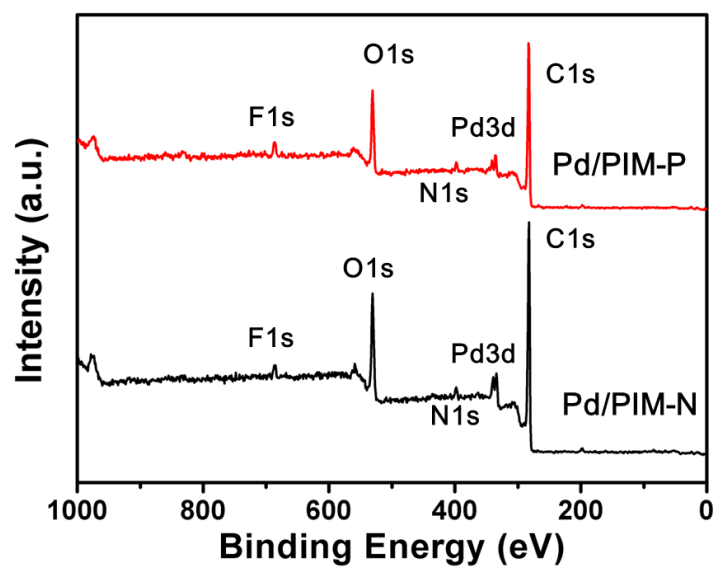

**Figure S11.** The XPS image of Pd/PIM-P and Pd/PIM-N.
